# Supplementary material for: Prehistoric and Early Roman Period Goldwork from Northwestern Iberia: An Analytical Study of Artefacts from the Archaeological and Historical Museum of A Coruña
Source: MDPI journal article supplement (doi:10.3390/heritage7040101), 2024-04-06
Supplement: s1 [file s1]

**Prehistoric and early Roman period goldwork from northwestern Iberia: analytical study of artefacts from the Archaeological and Historical Museum of A Coruña.**

García-Vuelta, O.; Armada, X.L.

| Provenance           | Object            | Inv. nº  | Analysed area                      | Au    | Ag    | Cu    | Sn    | Other elements                            | Analytical technique | Reference                 |
|----------------------|-------------------|----------|------------------------------------|-------|-------|-------|-------|-------------------------------------------|----------------------|---------------------------|
| Baroña               | Earring           | MAC-1211 | Not reported                       | 60.9  | 35.4  | 3.63  |       |                                           | XRF                  | [44] (p. 20)              |
| Dombate              | Bead              | MAC-4121 | --                                 | 88.29 | 9.05  | --    | 0.55  | As: 0.76; Sb: 0.74;<br>Fe: 0.41; Ni: 0.20 | AAS                  | [40] (p. 180)             |
| Elviña               | Torc or bracelet? | MAC-119  | Not reported                       |       | c. 25 | c. 24 | 0.062 | Pb: 0.049; Bi: 0.019;<br>Ni: tr.; Sb: tr. | OES/Specific gravity | [24] (p. 116-117, Au2983) |
| Orbellido            | Torc              | MAC-942  | Pyriiform terminal (internal edge) | 61.88 | 26.92 | 9.15  |       | Ni: 2,25                                  | XRF                  | [46] (p. 267)             |
| Orbellido            | Torc              | MAC-942  | Pyriiform terminal (external edge) | 71.50 | 22.61 | 5.90  |       |                                           | XRF                  | [46] (p. 267)             |
| San Martiño do Porto | Torc              | 933      | Not reported                       |       | 29    | 5.7   | 0.097 | Bi: c. 0.007                              | OES/Specific gravity | [24] (p. 122-123, Au2985) |

Table 2S. Previous analytical data of materials from the MAC collection studied in this article (% by weight) (tr. = trace elements) (Hartmann data: silver values reported as a percentage of the total; other elements reported as a percentage of the gold).
