# Supplementary material for: Prehistoric and Early Roman Period Goldwork from Northwestern Iberia: An Analytical Study of Artefacts from the Archaeological and Historical Museum of A Coruña
Source: MDPI journal article supplement (doi:10.3390/heritage7040101), 2024-04-06
Supplement: s1 [file s1]

**Prehistoric and early Roman period goldwork from northwestern Iberia: analytical study of artefacts from the Archaeological and Historical Museum of A Coruña**

García-Vuelta, O.; Armada, X.L.

|             | Au           | Au +/- | Ag           | Ag +/- | Cu           | Cu +/- |
|-------------|--------------|--------|--------------|--------|--------------|--------|
| <b>Std.</b> | <b>58.15</b> |        | <b>30.05</b> |        | <b>11.80</b> |        |
| M1          | 57.41        | 0.25   | 31.26        | 0.15   | 11.33        | 0.09   |
| M2          | 57.38        | 0.26   | 31.37        | 0.16   | 11.25        | 0.1    |

Table 1S. Elemental composition (wt.%) obtained by XRF for Fischer standard 603-681 (code CDMZK) (Std. = certified value; M = measured value).
