# Supplementary material for: Prehistoric and Early Roman Period Goldwork from Northwestern Iberia: An Analytical Study of Artefacts from the Archaeological and Historical Museum of A Coruña
Source: MDPI journal article supplement (doi:10.3390/heritage7040101), 2024-04-06
Supplement: s1 [file s1]

**Prehistoric and early Roman period goldwork from northwestern Iberia: analytical study of artefacts from the Archaeological and Historical Museum of A Coruña**

García-Vuelta, O.; Armada, X.L.

Heritage

Supplementary material 4

pXRF spectra location

Note: This document includes a selection of pXRF analysis location sketches corresponding to findings made up of several objects, or objects made up of various structural and ornamental elements that have been able to be analyzed individually with the pXRF equipment used in the study

## Prehistoric and early Roman period goldwork from northwestern Iberia: analytical study of artefacts from the Archaeological and Historical Museum of A Coruña

García-Vuelta, O.; Armada, X.L.

### Supplementary material 4. pXRF spectra location

Note: This document includes a selection of pXRF analysis location sketches corresponding to findings made up of several objects, or objects made up of various structural and ornamental elements that have been able to be analyzed individually with the pXrf equipment used in the study

### Early Bronze Age

#### Cícere artefacts

Accession Numbers: MAC 3780/1 – MAC 3780 / 11

pXRF spectra location

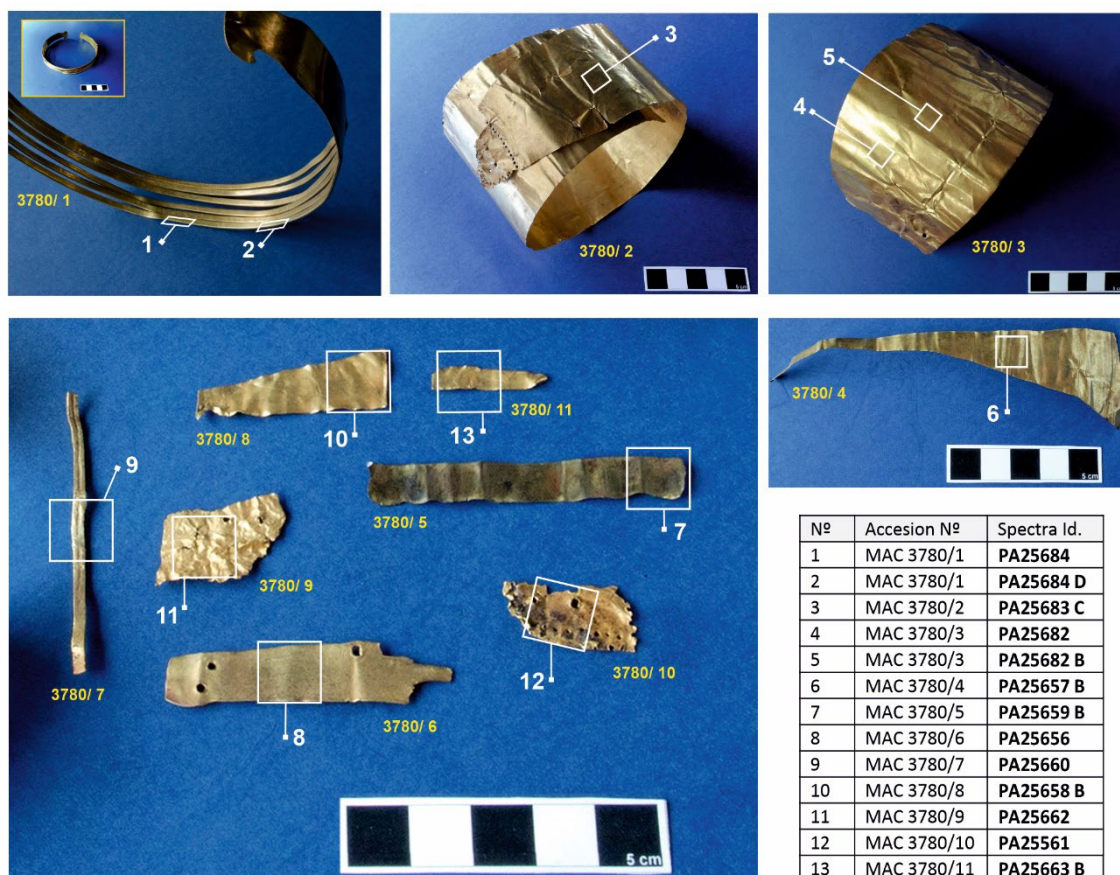

## II Iron Age

### S.Martinho do Porto. Torc

Accession Number: MAC-933

pXRF spectra location

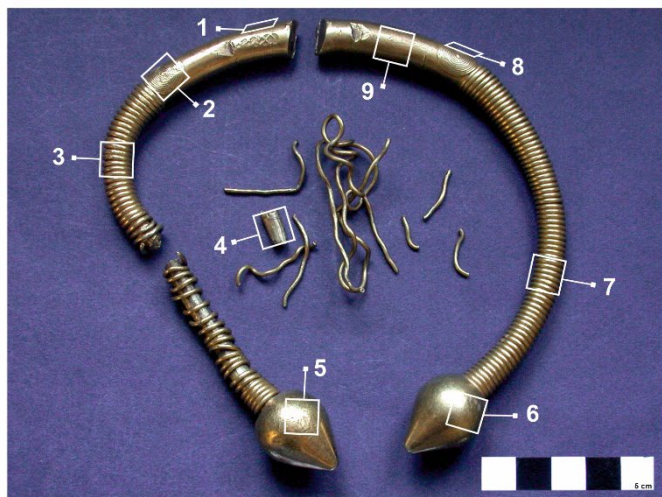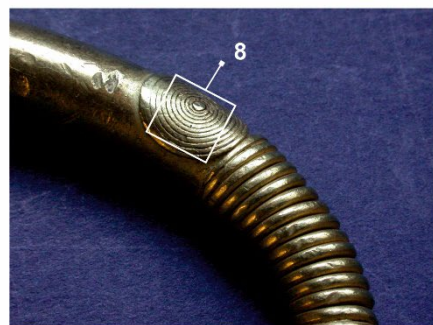

| Nº | Spectra Id. |
|----|-------------|
| 1  | PA25664 B   |
| 2  | PA25665     |
| 3  | PA25667     |
| 4  | PA25668     |
| 5  | PA25669 B   |
| 6  | PA25670     |
| 7  | PA25671     |
| 8  | PA25672     |
| 9  | PA25673     |

### Orbellido. Torc

Accession Number: MAC-942

pXRF spectra location

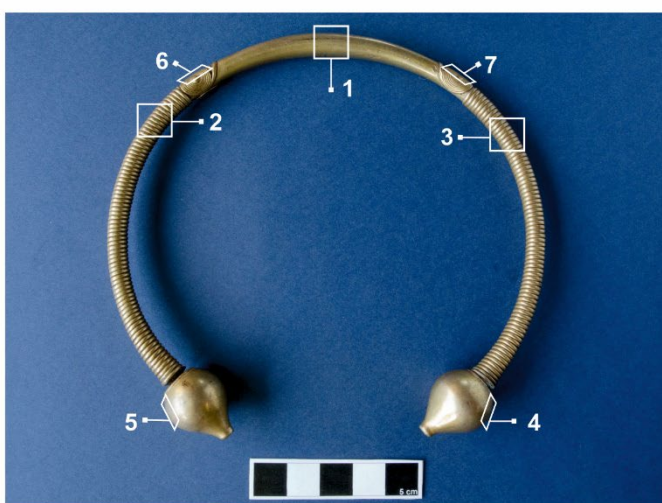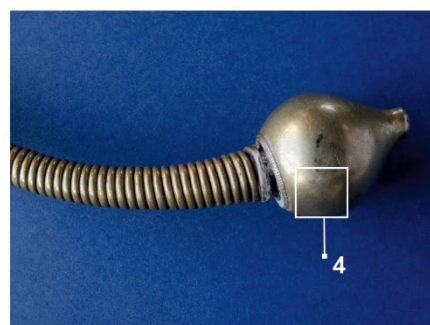

| Nº | Spectra Id. |
|----|-------------|
| 1  | PA25676     |
| 2  | PA25677     |
| 3  | PA25678     |
| 4  | PA25679 B   |
| 5  | PA25680 C   |
| 6  | PA25681     |
| 7  | PA25681 B   |



### **Xanceda. Torc nº 1**

Accession Number: MAC-842

pXRF spectra location

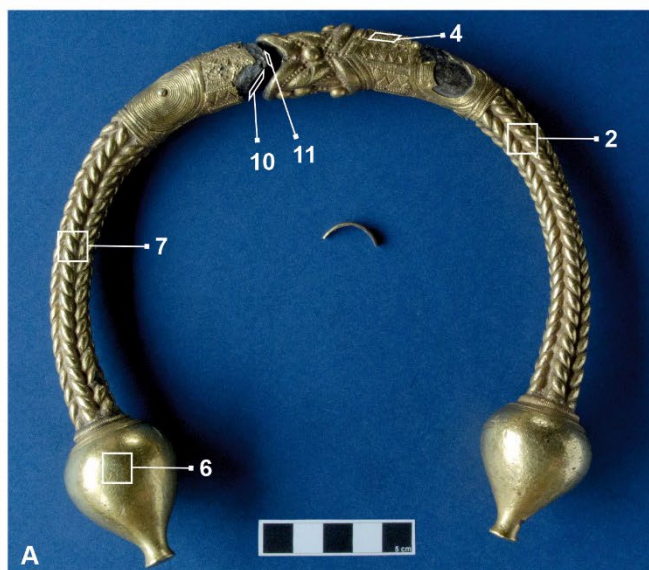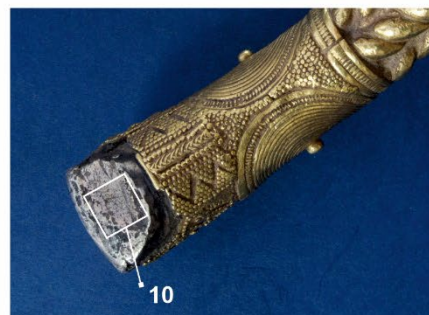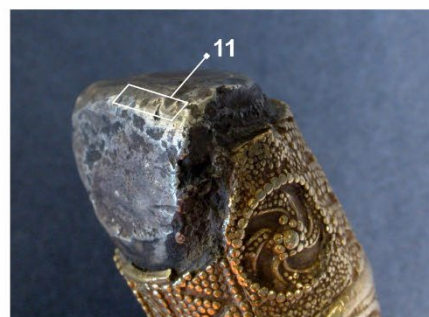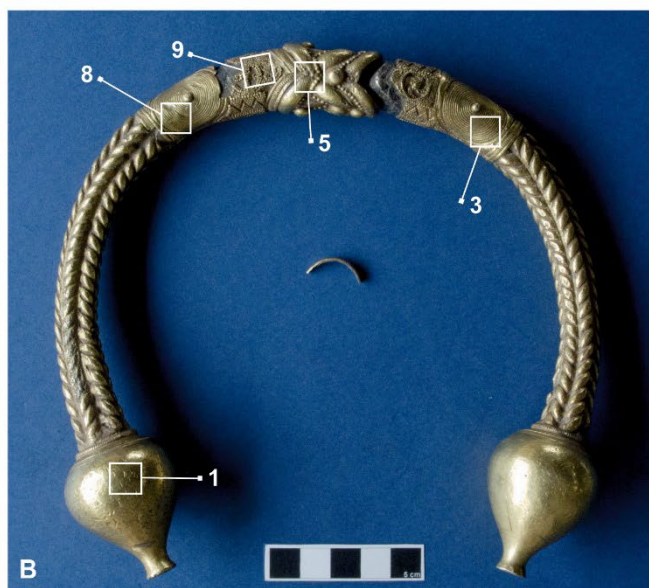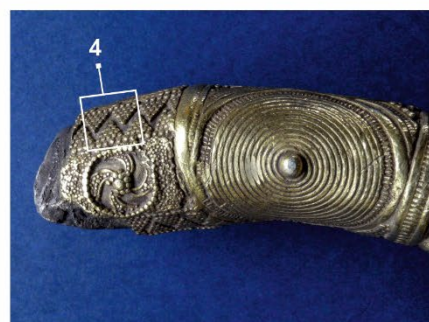

| Nº | Spectra Id. |
|----|-------------|
| 1  | PA25616     |
| 2  | PA25618     |
| 3  | PA25619     |
| 4  | PA25620     |
| 5  | PA25621B    |
| 6  | PA25622     |
| 7  | PA25623     |
| 8  | PA25624B    |
| 9  | PA25625     |
| 10 | PA25626     |
| 11 | PA25626 B   |

## Xanceda. Torc nº 2

Accession Number: MAC-925 / MAC-926 / MAC- 1385

pXRF spectra location

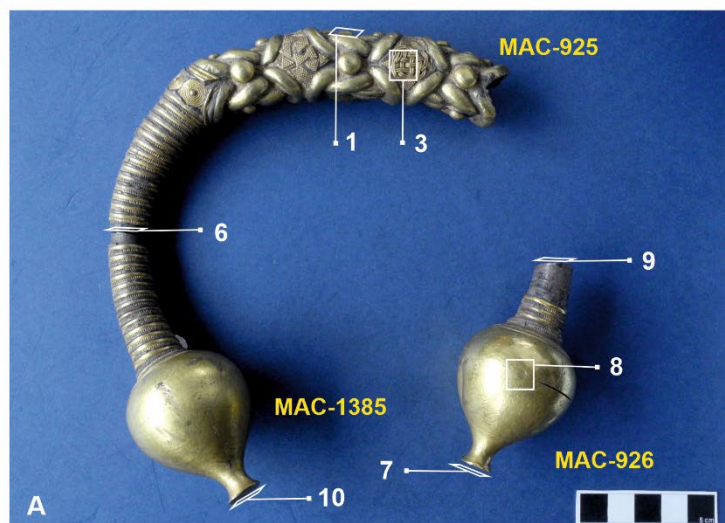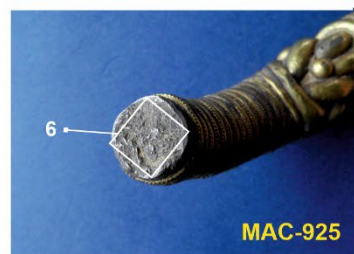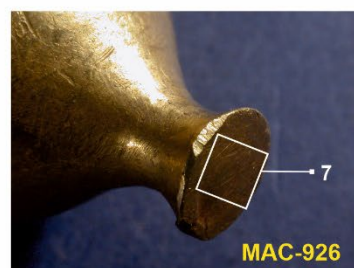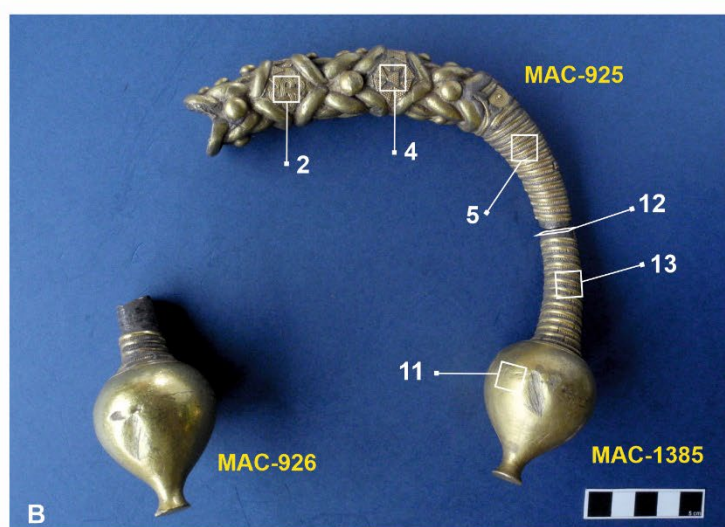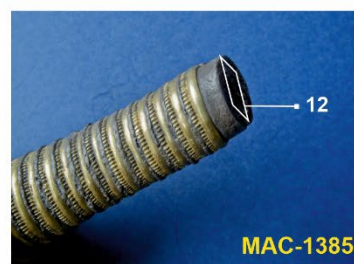

| Nº | Spectra Id. |
|----|-------------|
| 1  | PA25627 C   |
| 2  | PA25628     |
| 3  | PA25628 B   |
| 4  | PA25629     |
| 5  | PA25630     |
| 6  | PA25631     |
| 7  | PA25632     |
| 8  | PA25633 B   |
| 9  | PA25634     |
| 10 | PA25635     |
| 11 | PA25636 B   |
| 12 | PA25637     |
| 13 | PA25638     |



### Xanceda. Torc nº 3

Accession Number: MAC- 1386 / MAC - 1387

pXRF spectra location

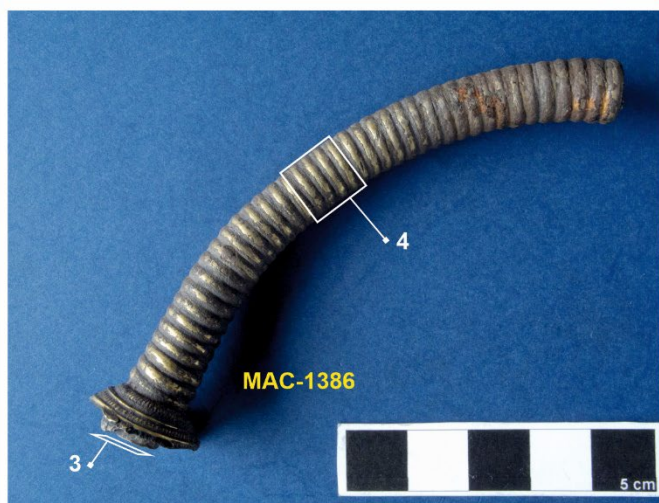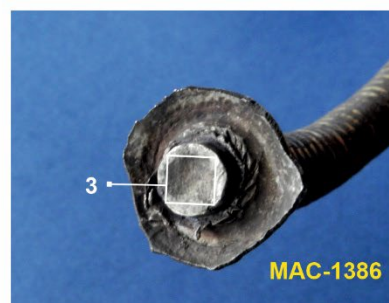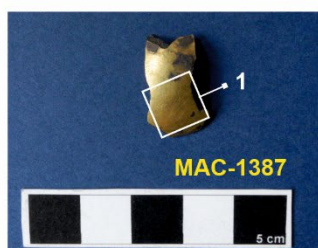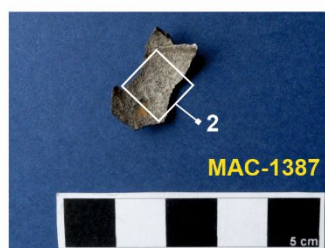

| Nº | Spectra Id. |
|----|-------------|
| 1  | PA25639 B   |
| 2  | PA25639 C   |
| 3  | PA25640 B   |
| 4  | PA25641     |

### Xanceda. Torc nº 4

Accession Number: MAC-927

pXRF spectra location

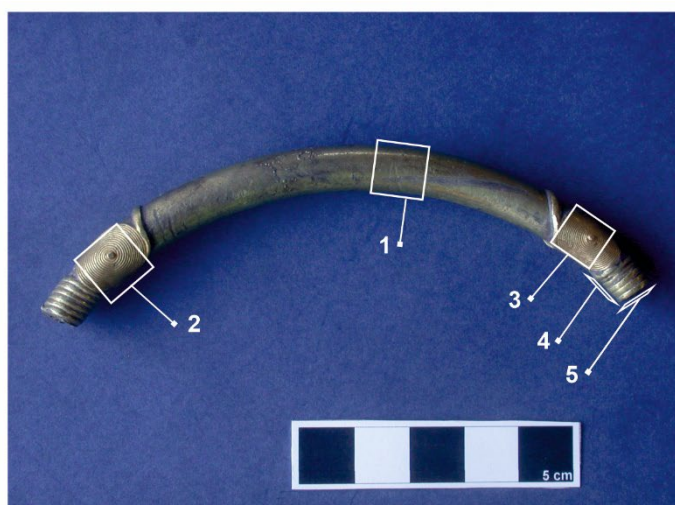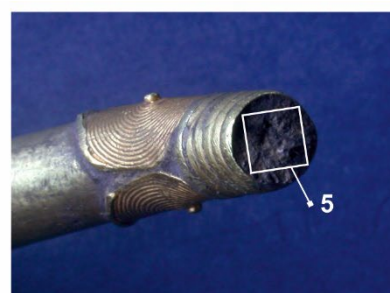

| Nº | Spectra Id. |
|----|-------------|
| 1  | PA25642 D   |
| 2  | PA25643     |
| 3  | PA25644     |
| 4  | PA25645     |
| 5  | PA25646     |

**Bronze Gilded Torc. Galicia (unknow prov.)**

Accession Number: MAC-3245

pXRF spectra location

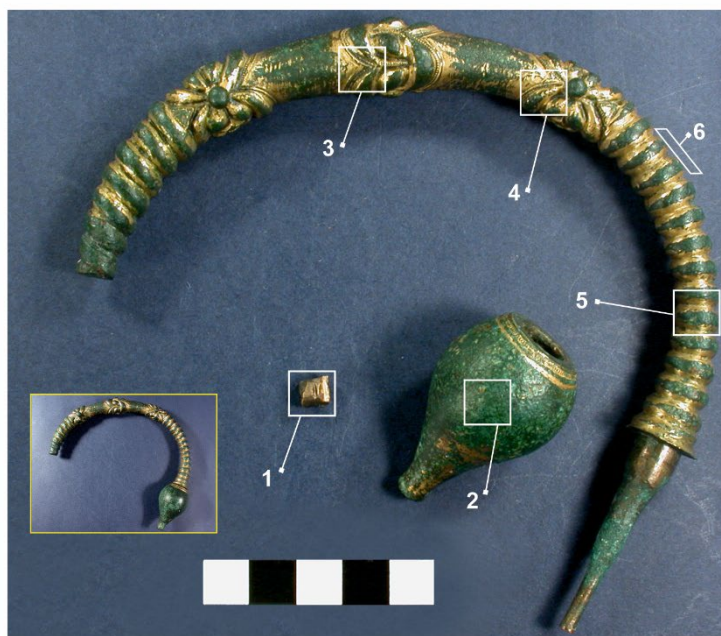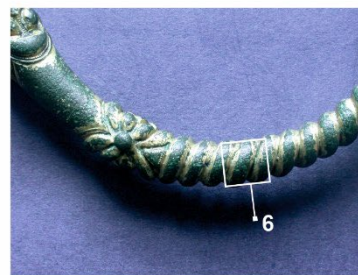

| Nº | Spectra Id. |
|----|-------------|
| 1  | PA25651     |
| 2  | PA25652     |
| 3  | PA25653     |
| 4  | PA25653 B   |
| 5  | PA25653 C   |
| 6  | PA25653 D   |
