# Supplementary material for: Prehistoric and Early Roman Period Goldwork from Northwestern Iberia: An Analytical Study of Artefacts from the Archaeological and Historical Museum of A Coruña
Source: MDPI journal article supplement (doi:10.3390/heritage7040101), 2024-04-06
Supplement: s1 [file s1]

**Prehistoric and early Roman period goldwork from northwestern Iberia: analytical study of artefacts from the Archaeological and Historical Museum of A Coruña**

García-Vuelta, O.; Armada, X.L.

| Provenance              | Inv. nº               | Code of analysis | Au    | Ag       | Cu      | Au    | Sn    | Other elements       | Analytical technique | Reference        |
|-------------------------|-----------------------|------------------|-------|----------|---------|-------|-------|----------------------|----------------------|------------------|
| Braga                   | MOT-001               |                  | 96.9  | 2.5      | 0.6     | 96.9  |       |                      | XRF                  | [71]             |
| Caldas de Reis          | 1277 (MP)             | Au2962           |       | c. 20-25 | 0.07    |       | 0.42  |                      | OES/Specific gravity | [24] (pp. 90-91) |
| Cícere                  | MAC-3780/1            | PA25684          | 90.8  | 9.2      | bdl     | 90.8  |       |                      | XRF                  | This article     |
| Cícere                  | MAC-3780/6            | PA25656          | 74.79 | 25.21    | bdl     | 74.79 |       |                      | XRF                  | This article     |
| Cícere                  | MAC-3780/7            | PA25660          | 75.19 | 24.81    | bdl     | 75.19 |       |                      | XRF                  | This article     |
| Mata'l Casare           | MAA                   | AA1256           | 90.46 | 8.644    | 0.418   | 90.46 | 0.045 | Fe: 0.018; Sb: 0.011 | XRF                  | [72] (p. 92)     |
| Monte dos Mouros        | 2015/583-584 (MPL)    |                  | 80.2  | 19.5     | 0.3     | 80.2  |       | Fe                   | XRF                  | [6]              |
| Monte dos Mouros I      | 2015/583 (MPL)        |                  | 81.8  | 18.0     | 0.2     | 81.8  |       |                      | XRF                  | [7]              |
| Monte dos Mouros II     | 2015/584 (MPL)        |                  | 87.7  | 12.1     | 0.2     | 87.7  |       |                      | XRF                  | [7]              |
| Roc'h-Guyon, Rondossecc | 72 398 MAN-St Germain | Au2179           |       | c. 15    | c. 0.01 |       | 0.15  |                      | OES                  | [24] (pp. 90-91) |
| Saint-Père-de-Retz      |                       |                  |       | c. 12.5  |         |       |       |                      | Wet chemistry        | [73] (p.26)      |
| Vale dos Moinhos        | MNALV O-77            | Au2587           |       | 15       | c. 0.02 |       | 0.20  |                      | OES/Specific gravity | [24] (pp. 88-89) |

Table S3. Analytical data of gold sheet collars from the Atlantic Europe (% by weight) (bdl = below detection limit) (Hartmann data: silver values reported as a percentage of the total; other elements reported as a percentage of the gold) (museum abbreviations: MOT/GMT = Museu do Ouro, Travassos; MP = Museo de Pontevedra; MAC = Museo Arqueológico e Histórico de San Antón, A Coruña; MAA = Museo Arqueológico de Asturias; MPL = Museo Provincial de Lugo; MAN-St Germain = Musée d'Archéologie Nationale, Saint-Germain-en-Laye; MNALV = Museu Nacional de Arqueologia, Lisbon).
